# Supplementary material for: Investigation of protein/DNA binding, and in vitro cytotoxicity of novel Cu(ii) and Zn(ii)-dipyrazinyl pyridine complexes
Source: Royal Society of Chemistry journal article supplement (doi:10.1039/d4nj01067a), 2024-01-01
Supplement: d4nj01067a1.pdf [file d4nj01067a1.pdf]

# Electronic Supplementary Information

## Investigation of protein/DNA binding, and *in vitro* cytotoxicity of novel Cu (II) and Zn(II)-dipyrazinyl pyridine complexes

Parnashabari Sarkar,<sup>a</sup> Munmi Gogoi,<sup>b</sup> Sonali Palo,<sup>a</sup> A.H. Udaya Kumar,<sup>c</sup> Sourav Sutradhar,<sup>a</sup>  
Dipankar Das,<sup>a</sup> N.K. Lokanath,<sup>c</sup> Akalesh Kumar Verma,<sup>\*b</sup> Biswa Nath Ghosh<sup>\*a</sup>

<sup>a</sup>*Department of Chemistry, National Institute of Technology Silchar, Silchar-788010, Assam, India, [bngghosh@che.nits.ac.in](mailto:bngghosh@che.nits.ac.in)*

<sup>b</sup>*Department of Zoology, Cell & Biochemical Technology Laboratory, Cotton University, Guwahati-781001, Assam, India, [akhilesh@cottonuniversity.ac.in](mailto:akhilesh@cottonuniversity.ac.in)*

<sup>c</sup>*Department of Studies in Physics, University of Mysore, Manasagangotri, Mysuru 570 006, Karnataka, India*

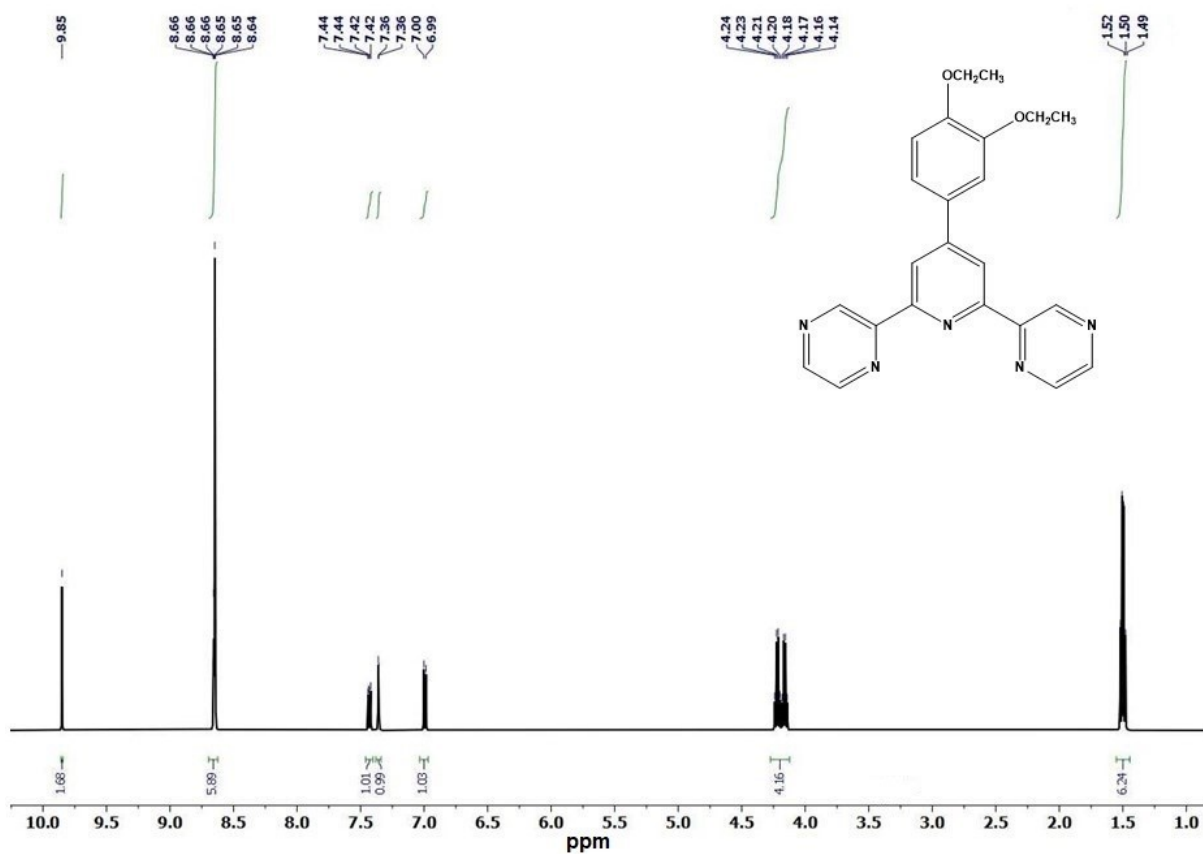

Figure S1(a): 400 MHz  $^1\text{H}$  NMR spectrum of L in  $\text{CDCl}_3$ .

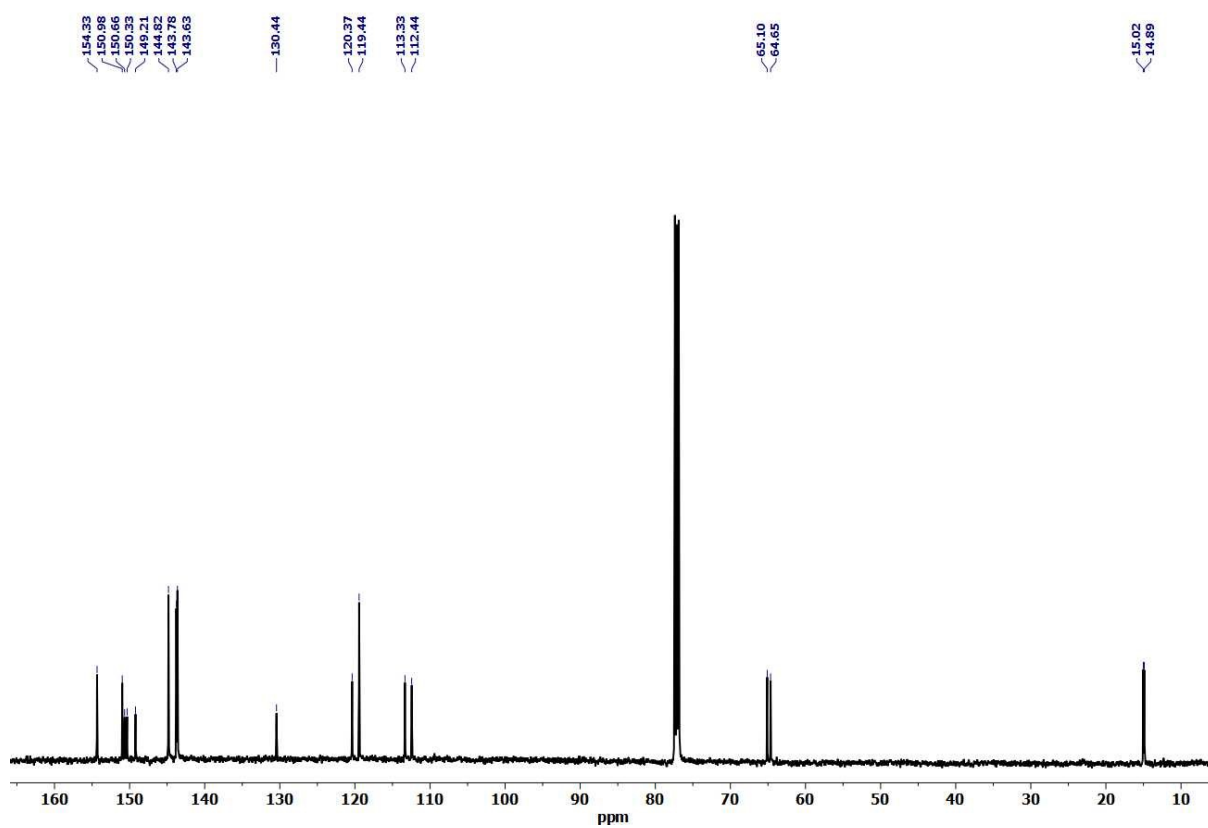

Figure S1(b): 125 MHz  $^{13}\text{C}$  NMR spectrum of L in  $\text{CDCl}_3$ .

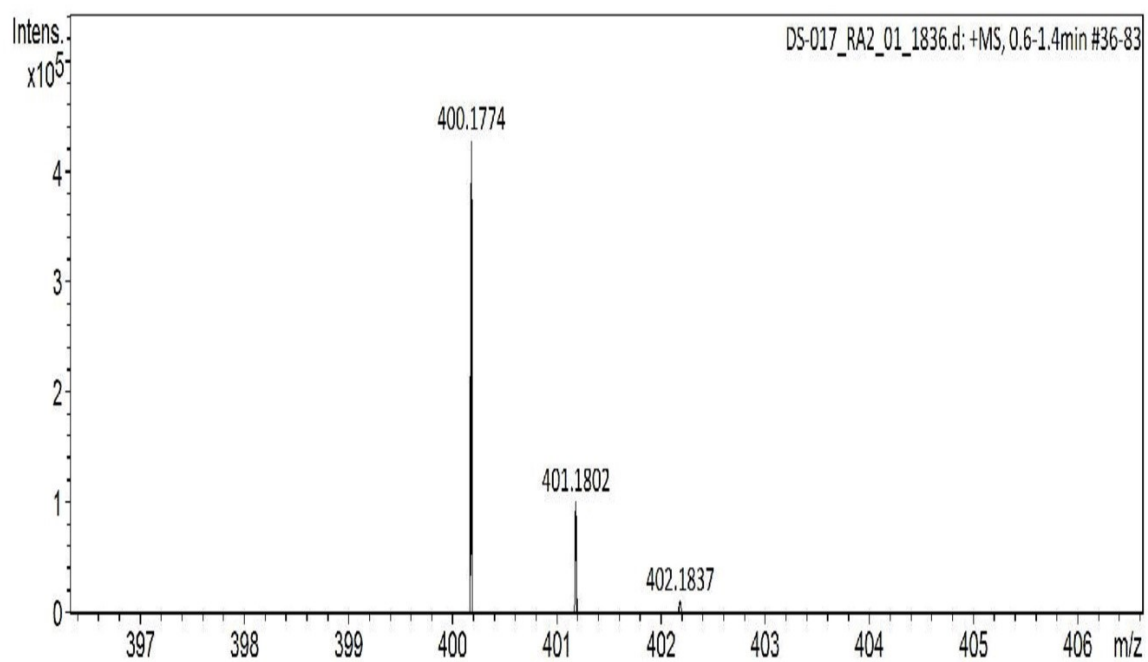

**Figure S1(c):** ESI-MS spectrum of **L** in  $\text{CDCl}_3$ .

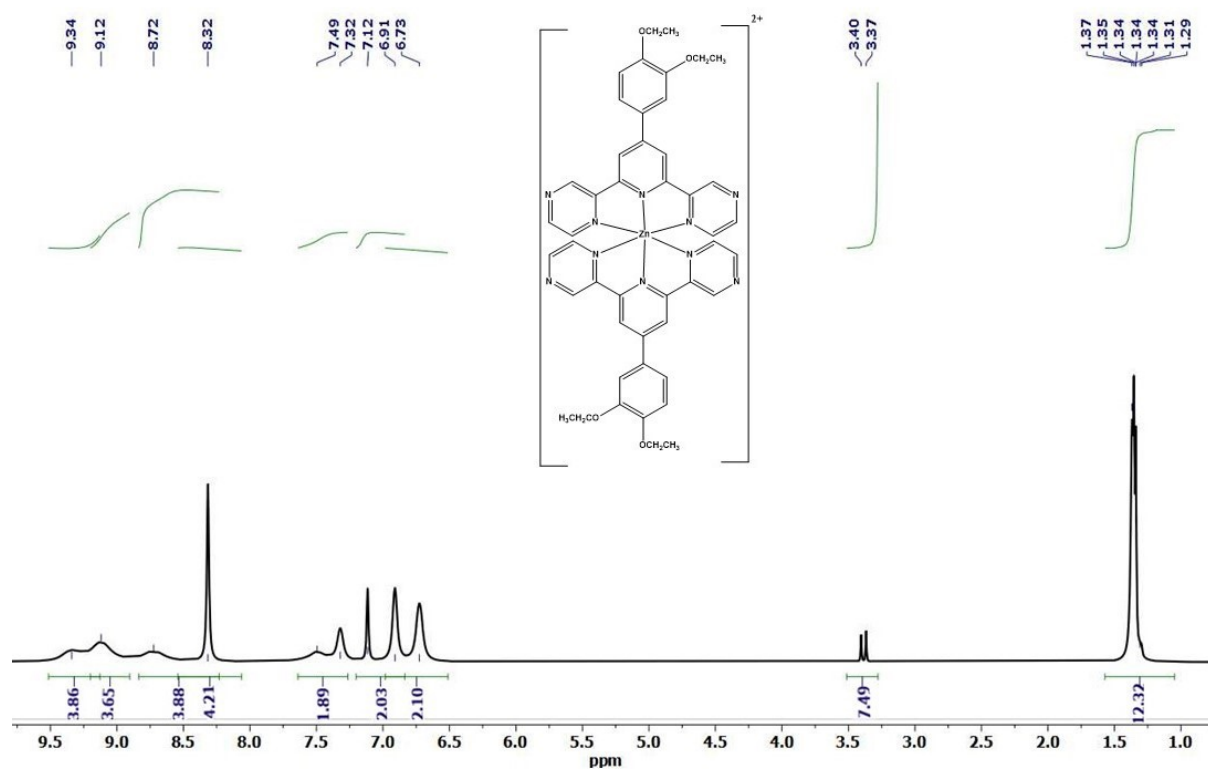

**Figure S2:** 400 MHz  $^1\text{H}$  NMR spectrum of **2** in  $\text{DMSO-d}_6$ .

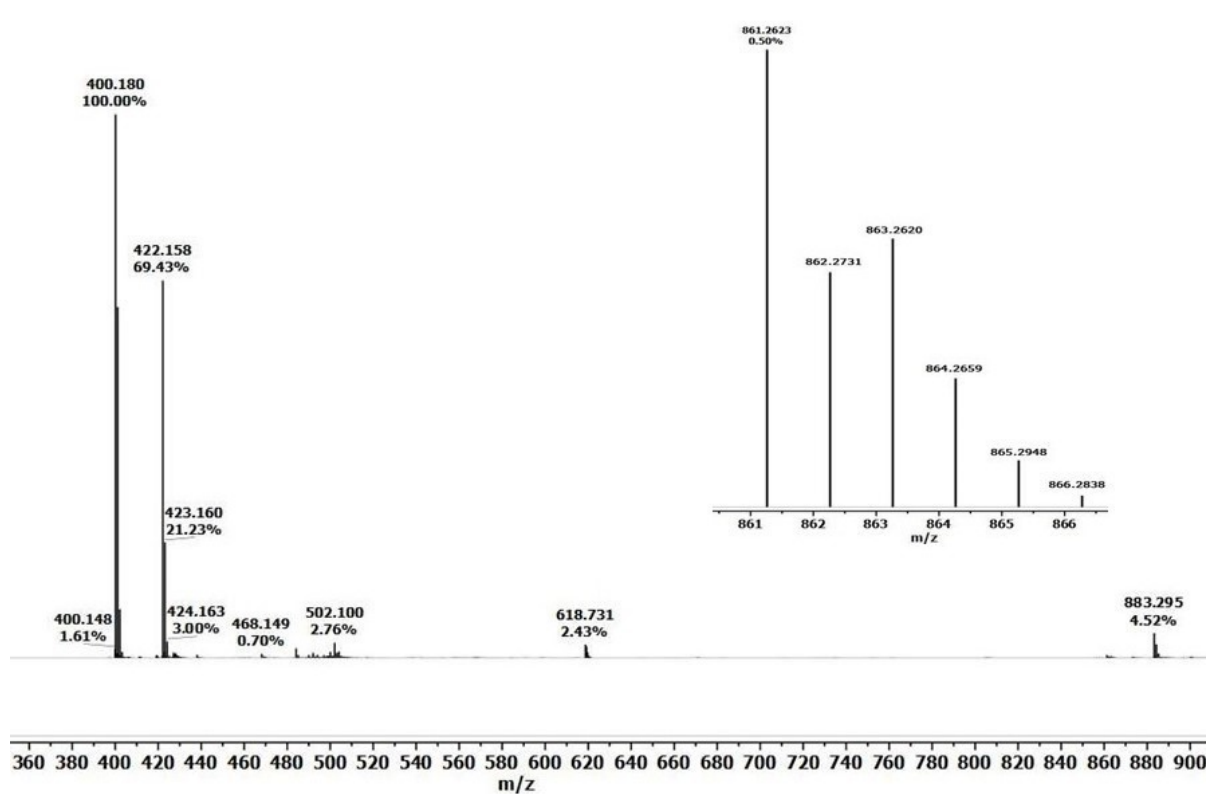

**Figure S3:** HR-MS of Cu (II) complex 1 (Inset: Isotopic distribution of molecular ion peak) inset).

E:\DS017\Mass\Zn(2-1)\ Injection 1 ESI (+) MS centroid MS + spectrum 7.40

E:\DS017\Mass\Zn(2-1)\ Injection 1 ESI (+) MS centroid MS + spect

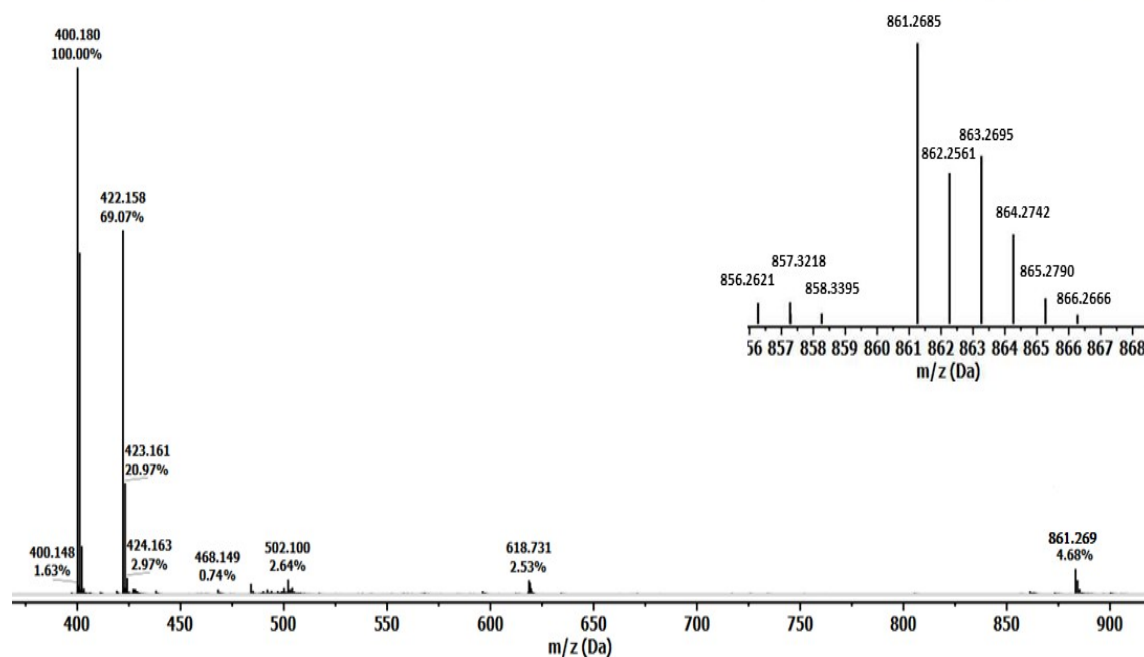

**Figure S4:** HR-MS of Zn (II) complex 2. (Inset: Isotopic distribution of molecular ion peak)

## Thermal stabilities of complexes

Thermal stabilities of complexes **1** and **2** have been investigated under the N<sub>2</sub> atmosphere by TGA at a 30-700 °C temperature range, with a heating rate of 10 °C/min. The thermal decomposition of the complexes take place with two main weight loss steps. The first weight loss starts from 30 °C to 330 °C in the DTG curve, attributed to the release of counter anion chloride (obs. 7.4% (for **1**) and 6.7% (for **2**), cal. 7.5% (for both **1-2**)). The second decomposition processes occur in the temperature range of 285-420 °C. The corresponding endothermic peaks are observed in the DTG curve at 390 °C for **1** (obs. 58.75%, cal. 53.68% for **1**) and 400 °C for **2** (obs. 57.88%, cal. 53.81% for **1**), corresponding to the loss of Cu(dppy) and Zn(dppy) fragment.

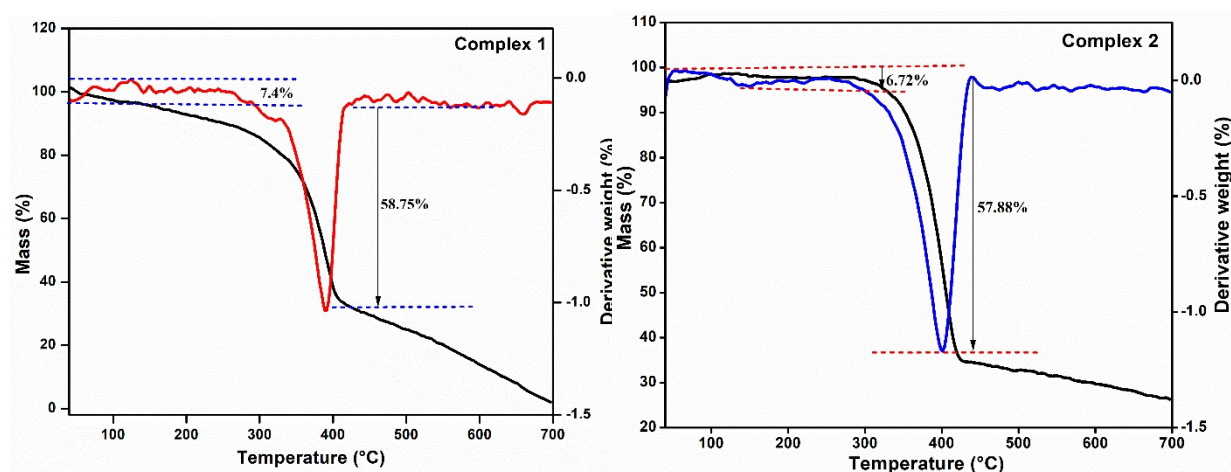

**Figure S5:** TGA and DTG thermograms of

complexes **1** (left) and **2** (right)

**Table S1.** Second-order perturbation theory analysis of Fock matrix in NBO calculation for **L**

| ligand | Donor (i) | Type    | Occupancy | Acceptor(j) | Type    | Occupancy | E(2)<br>kcal/mol | E(j)-<br>E(i) a.u | F(i, j)<br>a.u |
|--------|-----------|---------|-----------|-------------|---------|-----------|------------------|-------------------|----------------|
|        | C9-N32    | $\pi^*$ | 0.40233   | C7-C8       | $\pi^*$ | 0.34499   | 293.8            | 0.01              | 0.084          |
|        | C9-N32    | $\pi^*$ | 0.40233   | C10-C11     | $\pi^*$ | 0.32966   | 250.39           | 0.01              | 0.081          |
|        | C2-C3     | $\pi^*$ | 0.38227   | C1-C6       | $\pi^*$ | 0.38115   | 246.21           | 0.01              | 0.08           |

|         |         |         |         |         |         |        |      |       |
|---------|---------|---------|---------|---------|---------|--------|------|-------|
| C17-N33 | $\pi^*$ | 0.34302 | C18-C19 | $\pi^*$ | 0.31103 | 166.23 | 0.02 | 0.08  |
| C7-C8   | $\pi^*$ | 0.34499 | C1-C6   | $\pi^*$ | 0.38115 | 125.57 | 0.01 | 0.054 |
| C20-N51 | $\pi^*$ | 0.36362 | C18-C19 | $\pi^*$ | 0.31103 | 120.94 | 0.02 | 0.079 |
| C27     | LP(1)   | 0.94676 | C26-N50 | $\pi^*$ | 0.35578 | 88.71  | 0.12 | 0.112 |
| C25     | LP*(1)  | 0.94087 | C24-N34 | $\pi^*$ | 0.3417  | 77.9   | 0.13 | 0.112 |
| C27     | LP(1)   | 0.94676 | C24-N34 | $\pi^*$ | 0.3417  | 70.41  | 0.12 | 0.103 |
| C25     | LP*(1)  | 0.94087 | C26-N50 | $\pi^*$ | 0.3417  | 68.96  | 0.12 | 0.103 |

**Table S2:** Second-order perturbation theory analysis of Fock matrix in NBO calculation for complexes **1** and **2**.

|                  | Donor (i) | Type    | Occupancy | Acceptor(j) | Type    | Occupancy | E(2)<br>kcal/mol | E(j)-<br>E(i) a.u | F(i, j)<br>a.u |
|------------------|-----------|---------|-----------|-------------|---------|-----------|------------------|-------------------|----------------|
| Complex <b>2</b> | C56-C61   | $\pi^*$ | 0.18746   | C41-C55     | $\pi^*$ | 0.20044   | 139.96           | 0.01              | 0.079          |
|                  | C58-C65   | $\pi^*$ | 0.18935   | C54-C57     | $\pi^*$ | 0.19912   | 135.05           | 0.01              | 0.079          |
|                  | C59-C67   | $\pi^*$ | 0.1952    | C41-C55     | $\pi^*$ | 0.20044   | 127.26           | 0.01              | 0.081          |
|                  | C63-C70   | $\pi^*$ | 0.1965    | C54-C57     | $\pi^*$ | 0.19912   | 124.9            | 0.01              | 0.081          |
|                  | N8-C12    | $\pi^*$ | 0.34714   | C25-N42     | $\pi^*$ | 0.1668    | 123.33           | 0.02              | 0.096          |
|                  | C19       | LP(1)   | 0.52265   | N2-C9       | $\pi^*$ | 0.37942   | 68.49            | 0.1               | 0.108          |
|                  | N2-C9     | $\pi^*$ | 0.37942   | C21-C38     | $\pi^*$ | 0.19422   | 63.09            | 0.06              | 0.099          |
|                  | N1-C3     | $\pi^*$ | 0.38106   | C11-C23     | $\pi^*$ | 0.19091   | 61.8             | 0.06              | 0.099          |
|                  | C21-C38   | $\pi^*$ | 0.19422   | C54-C57     | $\pi^*$ | 0.19912   | 60.96            | 0.01              | 0.06           |
|                  | C11-C23   | $\pi^*$ | 0.19091   | C41-C55     | $\pi^*$ | 0.20044   | 57.03            | 0.01              | 0.058          |
| Complex <b>1</b> | C58-C65   | $\pi^*$ | 1.97757   | C54-C57     | $\pi^*$ | 0.39507   | 277.56           | 0.01              | 0.079          |
|                  | N6-C17    | $\pi^*$ | 1.65183   | C32-N47     | $\pi^*$ | 0.3378    | 255.42           | 0.02              | 0.094          |
|                  | C63-C70   | $\pi^*$ | 1.65183   | C54-C57     | $\pi^*$ | 0.39507   | 255.34           | 0.01              | 0.081          |
|                  | N8-C12    | $\pi^*$ | 1.97752   | C25-N42     | $\pi^*$ | 0.33783   | 255.28           | 0.02              | 0.094          |

|         |         |         |         |         |         |        |      |       |
|---------|---------|---------|---------|---------|---------|--------|------|-------|
| N5-C14  | $\pi^*$ | 1.97203 | C27-N44 | $\pi^*$ | 0.33749 | 253.71 | 0.02 | 0.094 |
| N7-C19  | $\pi^*$ | 1.97757 | C35-N50 | $\pi^*$ | 0.33736 | 253    | 0.02 | 0.094 |
| C35-N50 | $\pi^*$ | 1.97203 | C18-C33 | $\pi^*$ | 0.26457 | 86.98  | 0.02 | 0.071 |
| C27-N44 | $\pi^*$ | 1.9775  | C15-C28 | $\pi^*$ | 0.2645  | 86.96  | 0.02 | 0.071 |
| C32-N47 | $\pi^*$ | 1.97207 | C16-C30 | $\pi^*$ | 0.26456 | 85.68  | 0.02 | 0.071 |
| C25-N42 | $\pi^*$ | 1.97207 | C20-C36 | $\pi^*$ | 0.26465 | 32.48  | 0.16 | 0.107 |

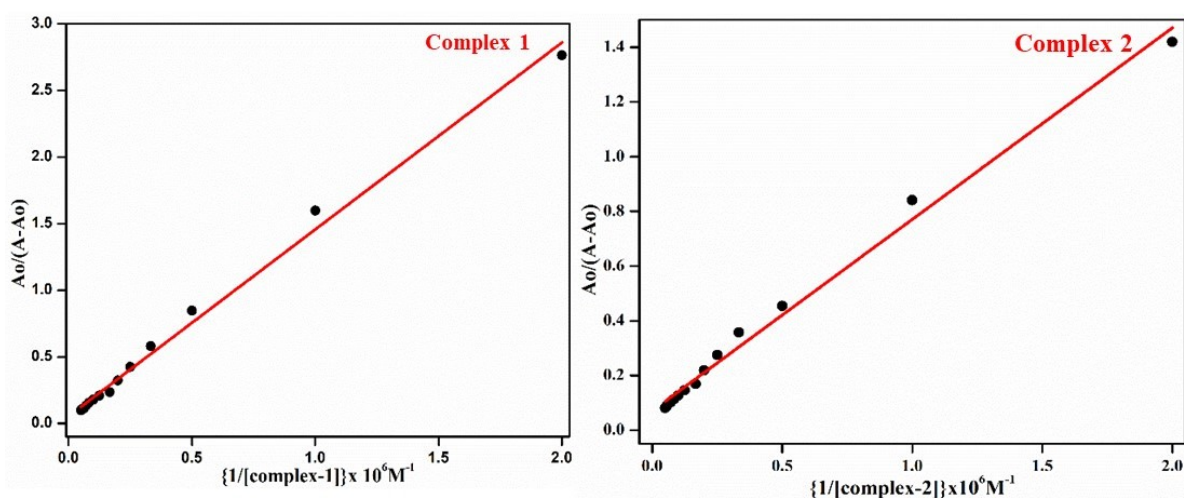

**Figure S6:** Benesi-Hildebrand plot  $\{A_0/(A-A_0)\}$  vs.  $1/[\text{complex}]$  of absorption spectra of BSA in the absence and presence of complex 1 and complex 2.

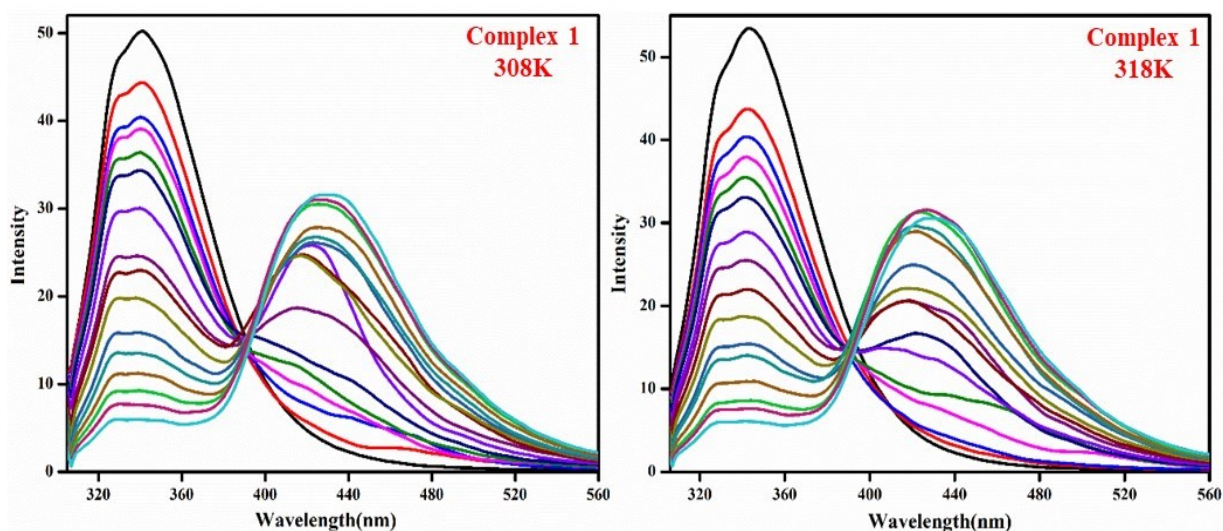

**Figure S7:** Emission spectra of BSA ( $10 \mu\text{M}$ ) ( $\lambda_{\text{ex}} = 280 \text{ nm}$ ) in the presence of increasing concentrations of complex 1 at 308 K and 318 K.



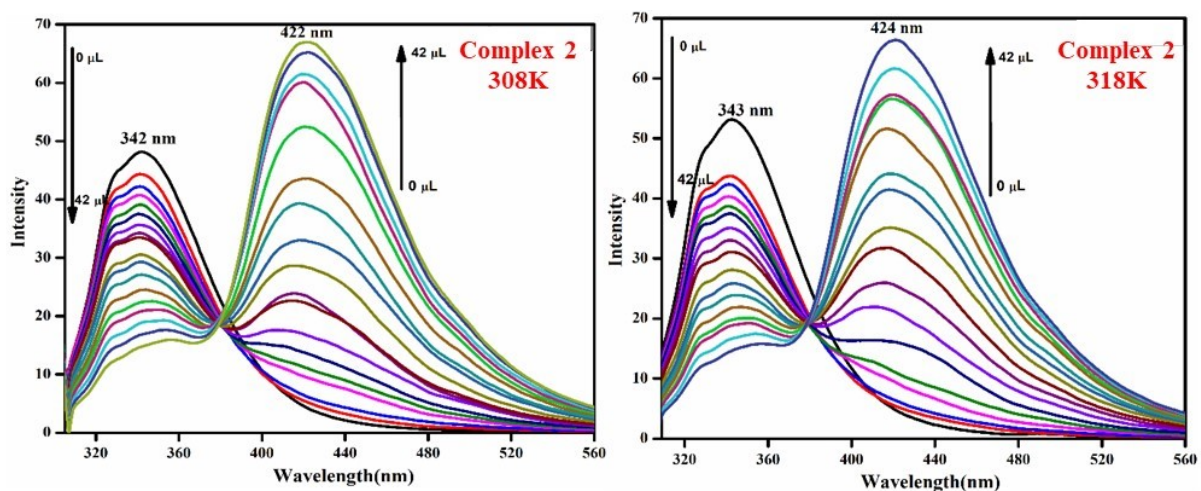

**Figure S8:** Emission spectra of BSA ( $10 \mu\text{M}$ ) ( $\lambda_{\text{ex}} = 280 \text{ nm}$ ) in the presence of increasing concentrations of complex 2 at 308 K and 318 K.

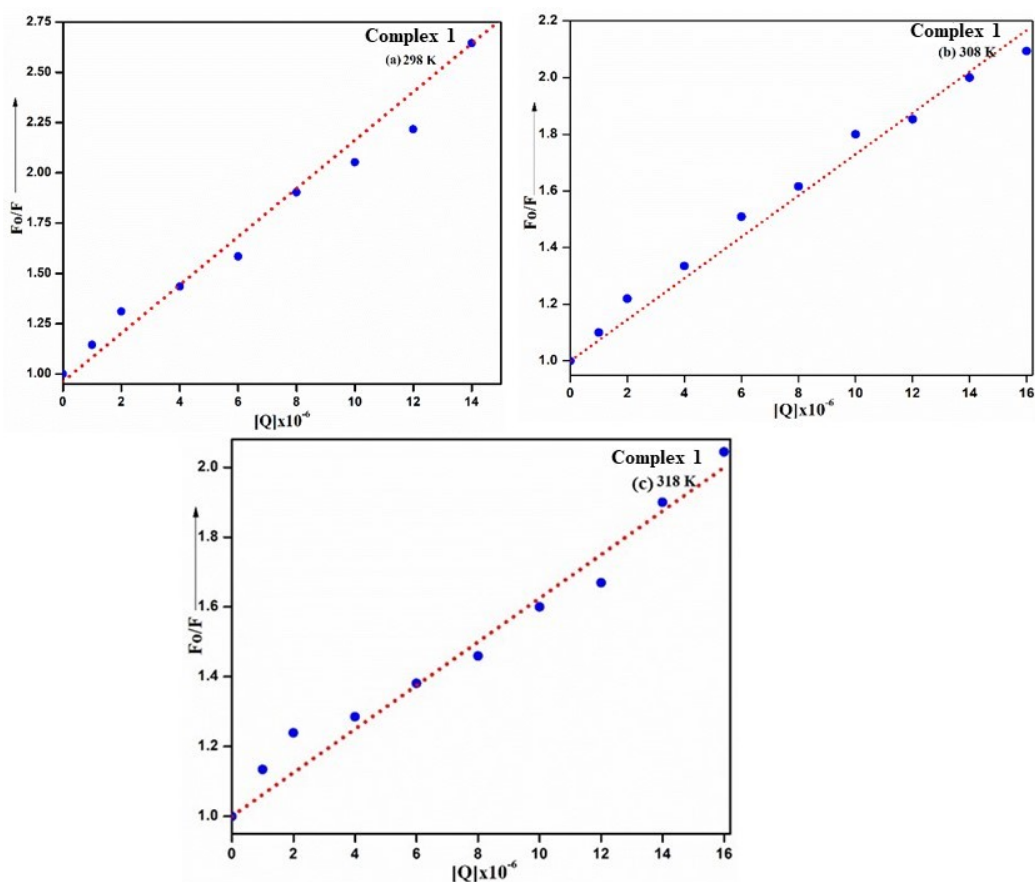

**Figure S9:** Stern-Volmer plot  $\{F_0/F \text{ vs. } [\text{complex}]\}$  of emission spectra of BSA in the absence and presence of complex 1 at 298 K, 308 K and 318 K.



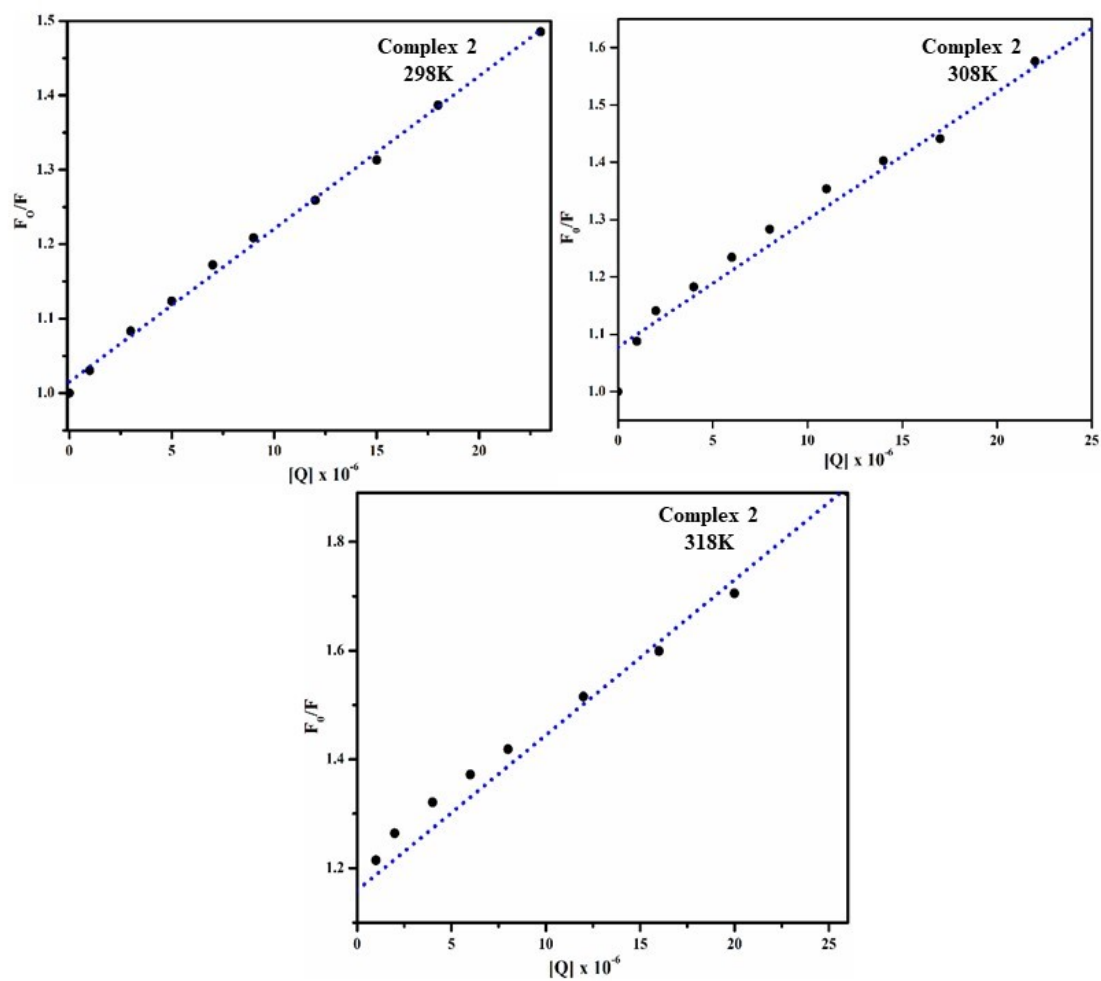

**Figure S10:** Stern-Volmer plot  $\{F_0/F$  vs.  $[complex]\}$  of emission spectra of BSA in the absence and presence of complex 2 at 298 , 308 K, and 318 K.

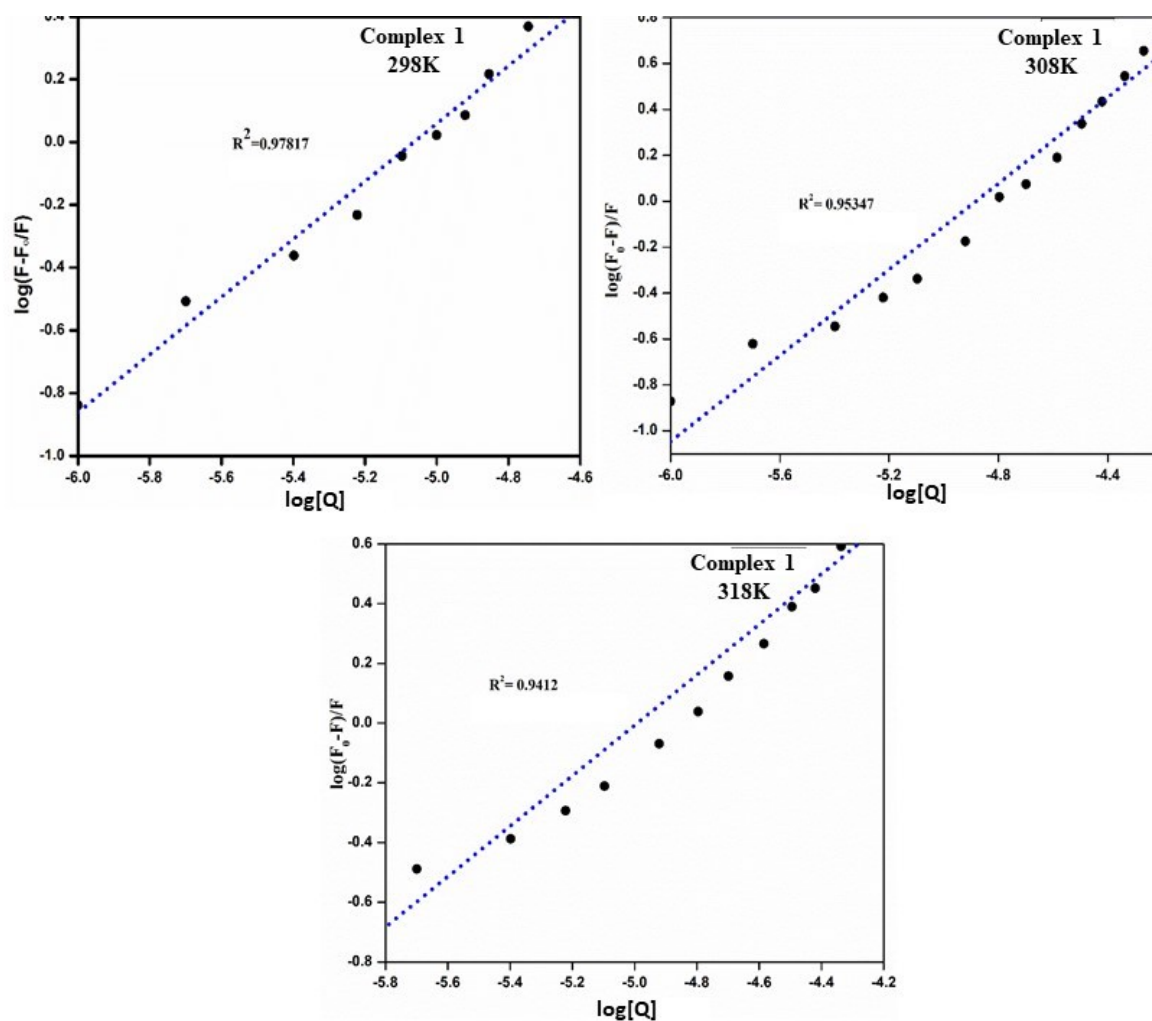

**Figure S11:** Modified Stern-Volmer plot of emission spectra of BSA in the absence and presence of complex **1** at 298 K, 308 K and 318 K.

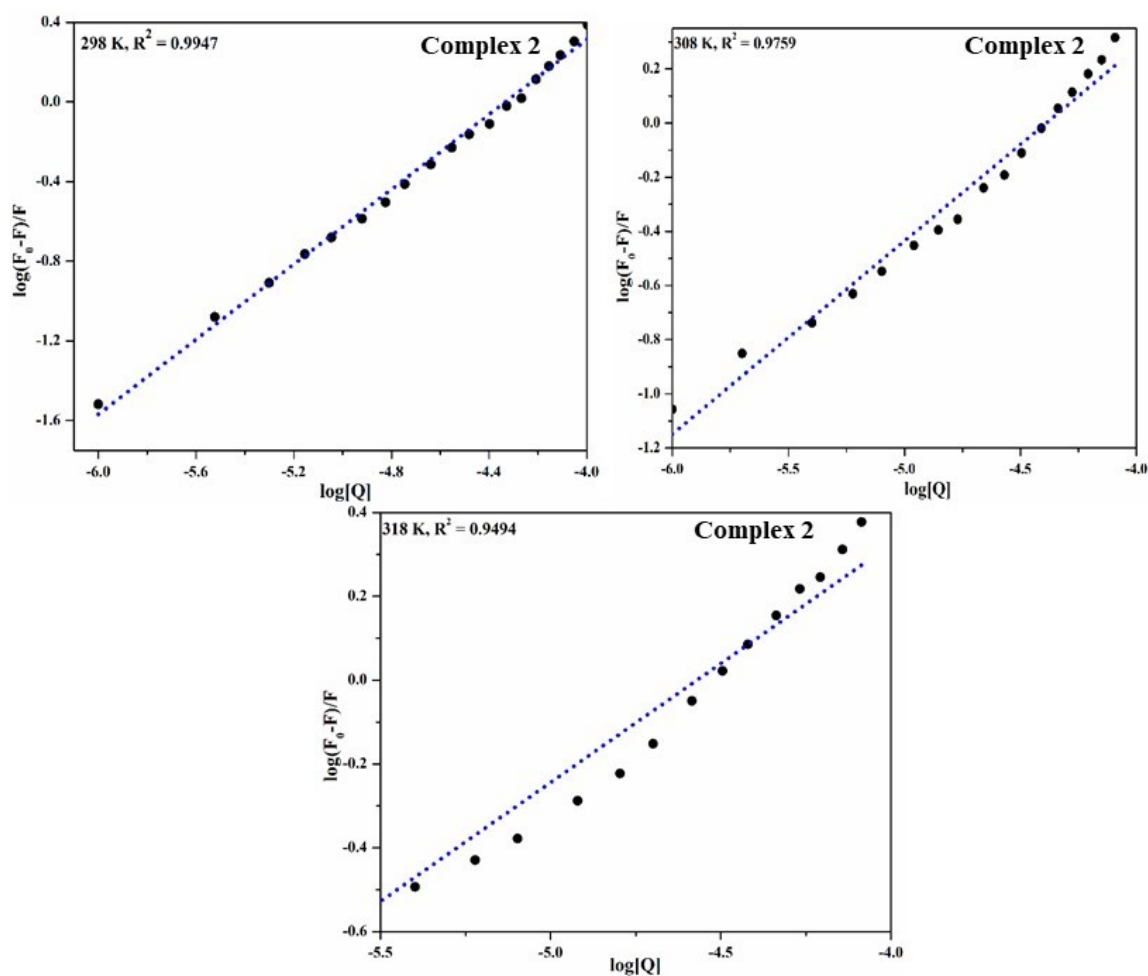

**Figure S12:** Modified Stern-Volmer plot of emission spectra of BSA in the absence and presence of complex **2** at 298 K, 308 K, and 318 K.

Equations **1-3** are employed to analyse thermodynamic parameters like  $\Delta H$ ,  $\Delta G$ , and  $\Delta S$ , if the enthalpy change ( $\Delta H$ ) does not vary much over the temperature range under study.

$$\ln K = \Delta H/RT + \Delta S/R \quad (1)$$

$$\Delta G = -RT \ln K \quad (2)$$

$$\Delta S = (\Delta H - \Delta G)/T \quad (3)$$

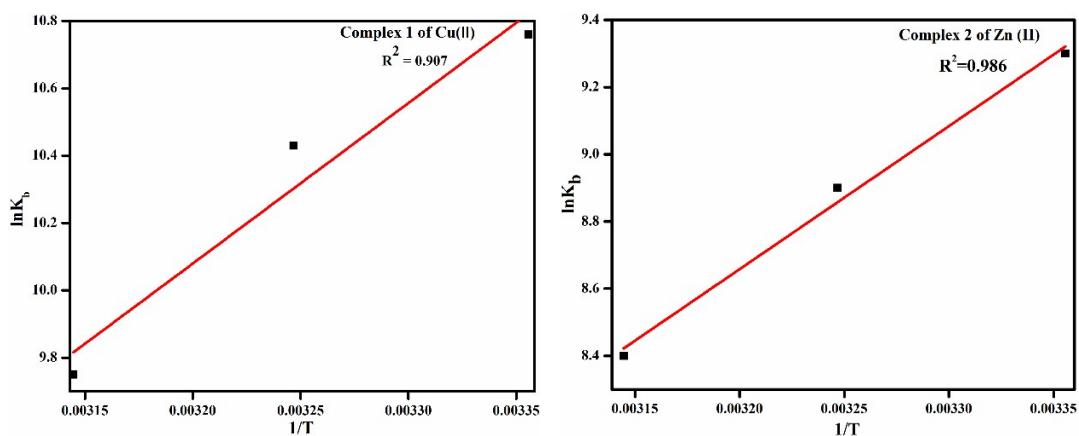

**Figure S13:** van't Hoff plots for BSA in presence of complexes 1 and 2 at different temperatures.

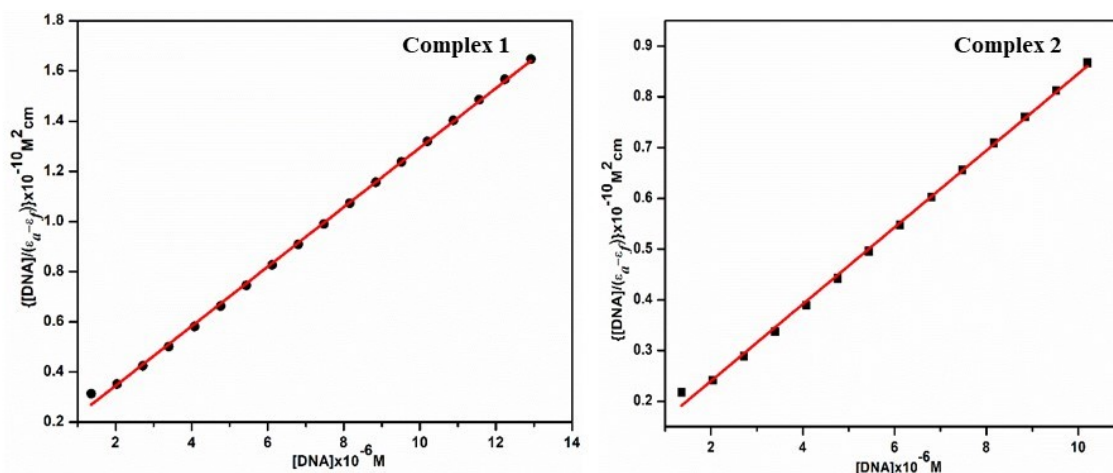

**Figure S14:** DNA binding study of metal complexes in the absence and presence of DNA with the electronic absorption spectra.

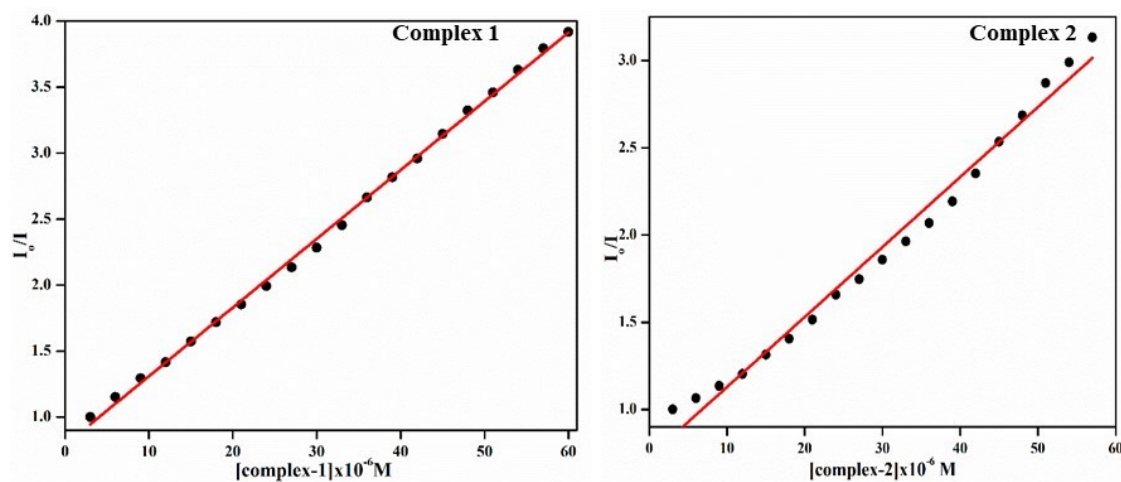

**Figure S15:** Stern-Volmer plot  $\{F_0/F \text{ vs. } [complex]\}$  of emission spectra of DNA in the absence and presence of complex 1-2.

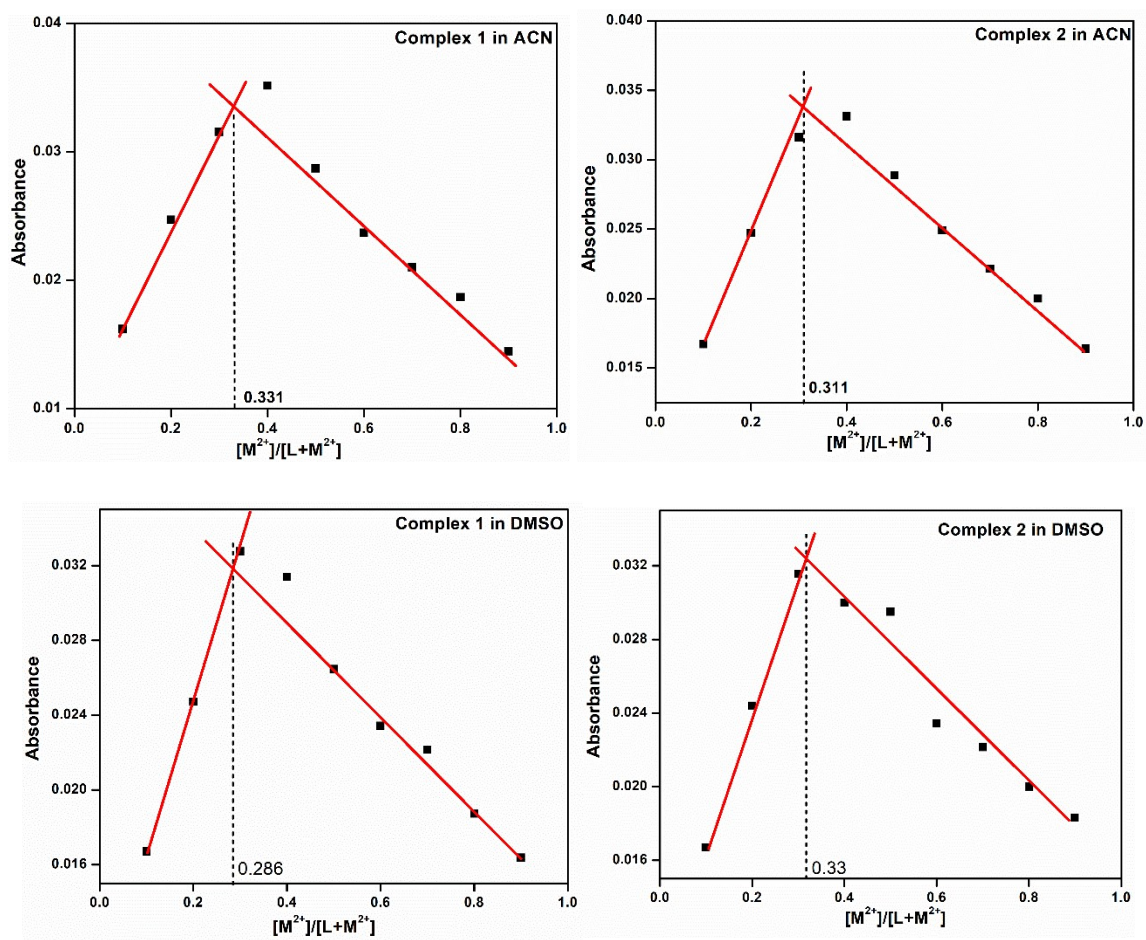

**Figure S16:** Job's plots for complexes 1-2 in ACN (top) and DMSO (below) medium

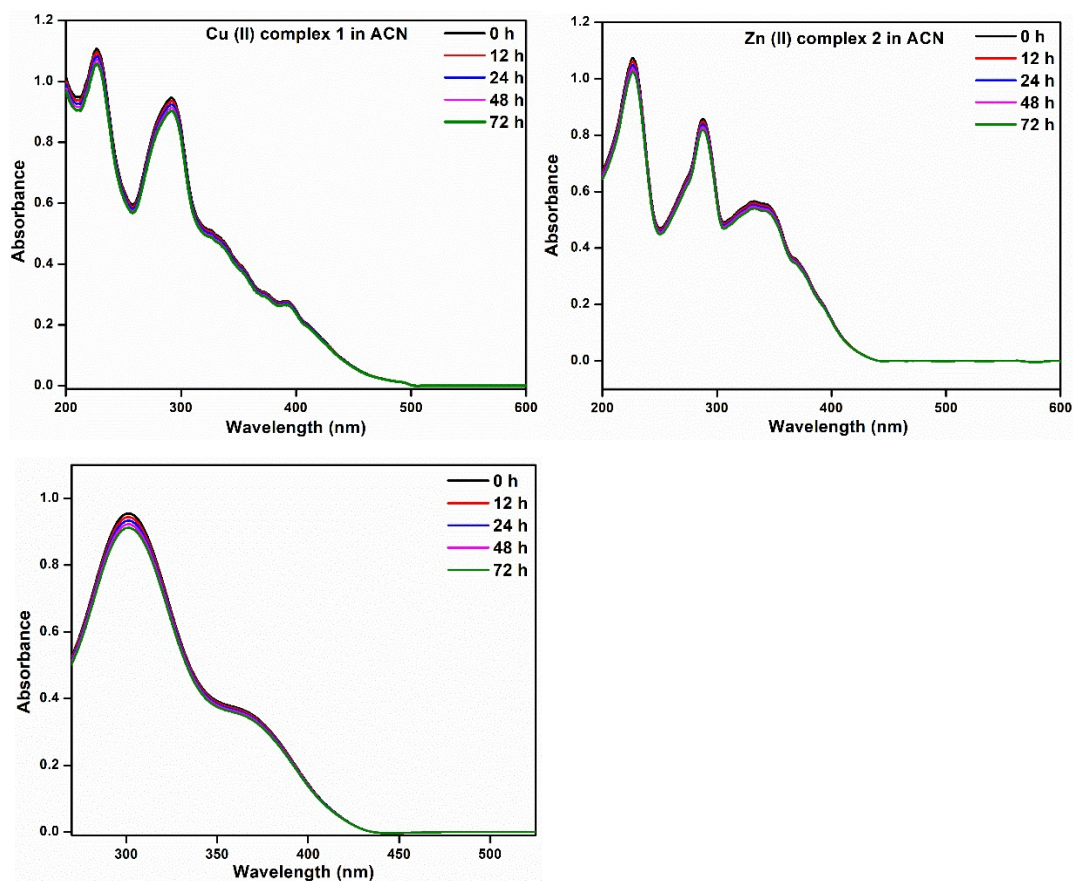

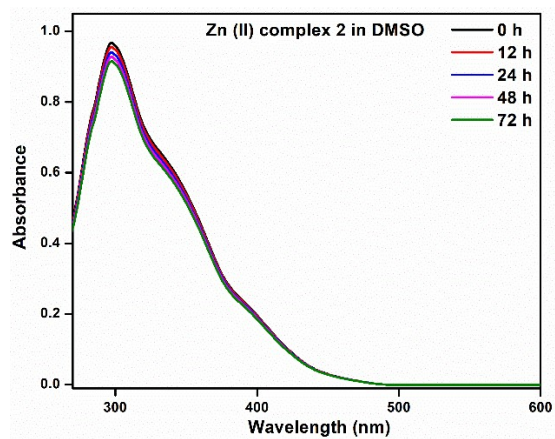

**Figure S17:** UV-Visible absorption spectra of the complexes 1-2 at different time intervals in ACN (top) and DMSO (below).
